# Supplementary material for: Effects of burosumab on osteocalcin and bone mineral density in patient with 15-year history of nonremission tumor-induced osteomalacia initially treated with conventional therapy: Case report
Source: PubMed Central journal article supplement — Bone Rep. 2020 Nov 21;13:100736. doi: 10.1016/j.bonr.2020.100736 (PMC7701316; doi:10.1016/j.bonr.2020.100736), 2020-11-21
Supplement: mmc1.pdf [file mmc1.pdf]

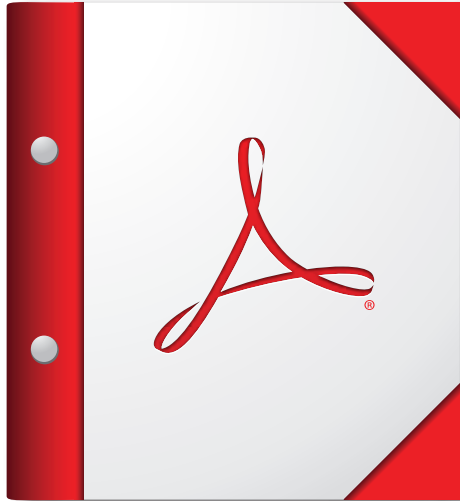

**For the best experience, open this PDF portfolio in  
Acrobat X or Adobe Reader X, or later.**

[Get Adobe Reader Now!](#)
